# Supplementary material
Source: PubMed Central journal article supplement (PMC5118999)
Supplement: AAC.01591-16_zac012165751so1.pdf [file AAC.01591-16_zac012165751so1.pdf]

Dice (Opt:1.50%) (Tol 1.0%-1.0%) (H>0.0% S>0.0%) [0.0%-100.0%]

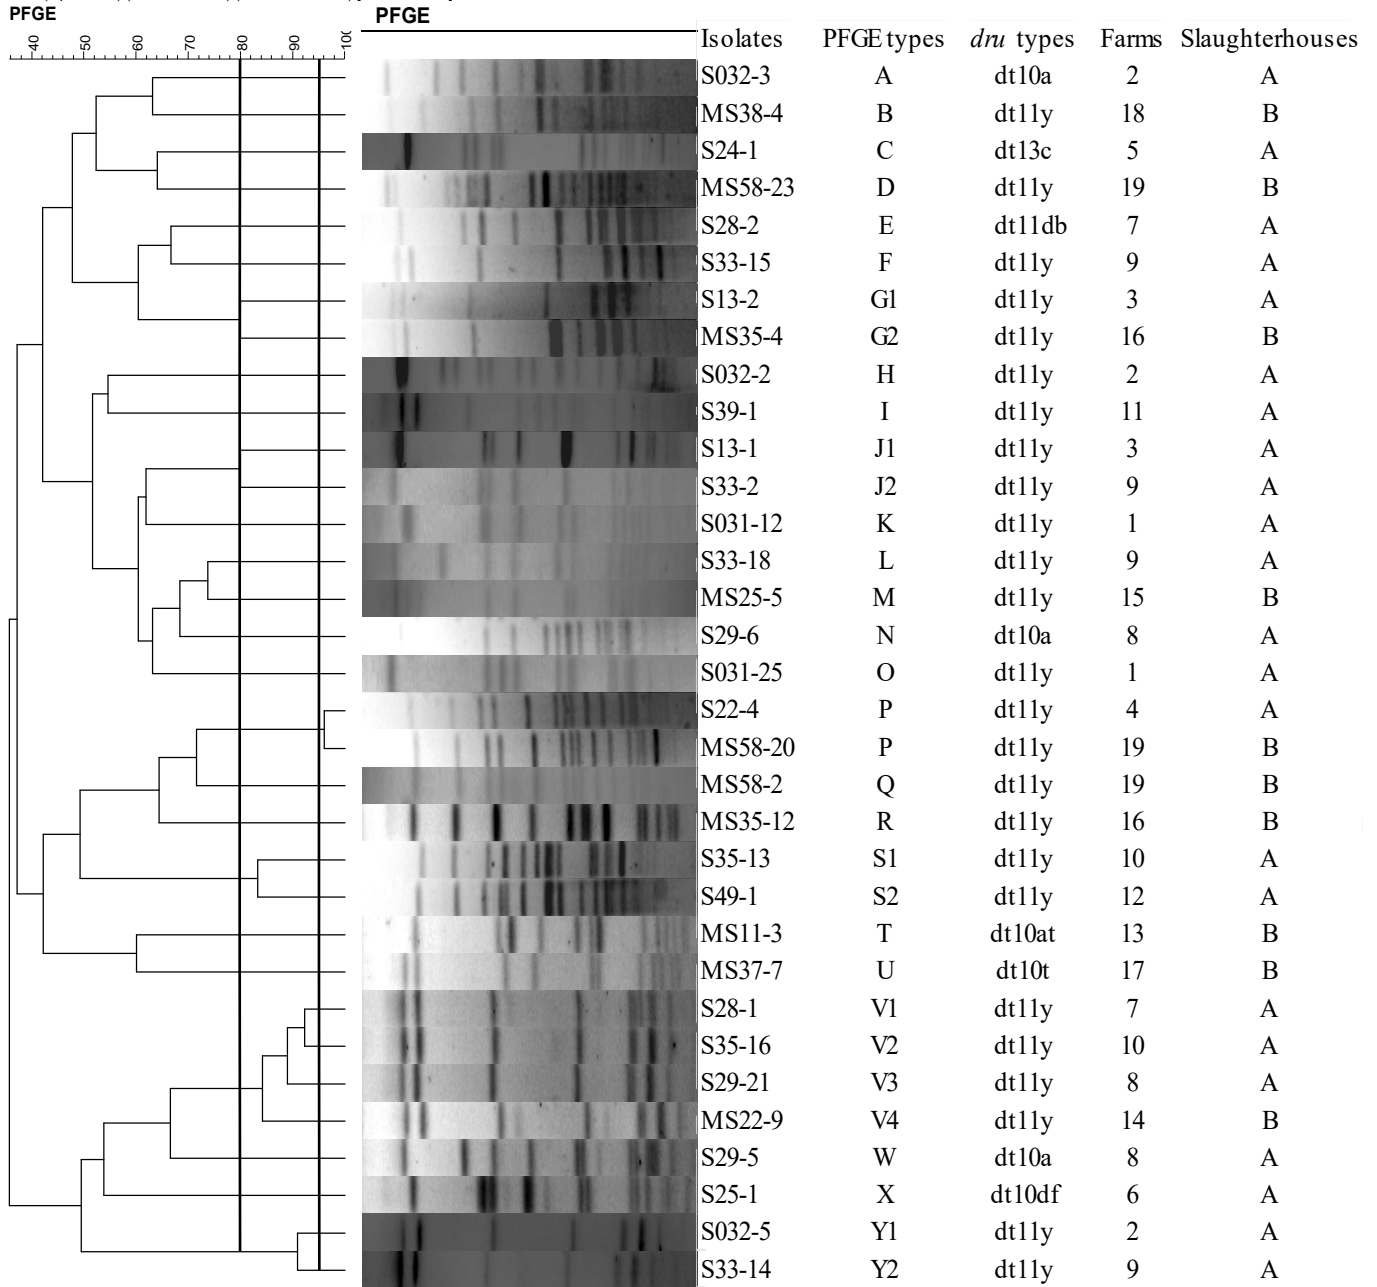

Figure S1. Pulsed-field gel electrophoresis (PFGE) patterns of SmaI-digested DNA of the oprA-positive MRCoNS isolates of porcine origin.
